# Supplementary material for: Competitive adsorption of oxygen-containing intermediates on ruthenium–tin solid-solution oxides for alkaline oxygen evolution
Source: Royal Society of Chemistry journal article supplement (doi:10.1039/d3ta05347d), 2023-01-01
Supplement: d3ta05347d1.pdf [file d3ta05347d1.pdf]

## Supporting Information

### Competitive Adsorption of Oxygen-containing Intermediates on Ruthenium-tin Solid-solution Oxides for Alkaline Oxygen Evolution

*Shuyu Jia, ‡, a Jiachen Zhang, ‡, a Qicheng Liu, a Caini Ma, a Yawen Tang\*, a and  
Hanjun Sun\*, a*

a. Jiangsu Key Laboratory of New Power Batteries, Jiangsu Collaborative Innovation  
Centre of Biomedical Functional Materials, School of Chemistry and Materials  
Science, Nanjing Normal University, Nanjing 210023, China.

\*E-mail: tangyawen@njnu.edu.cn, hanjun.sun@njnu.edu.cn

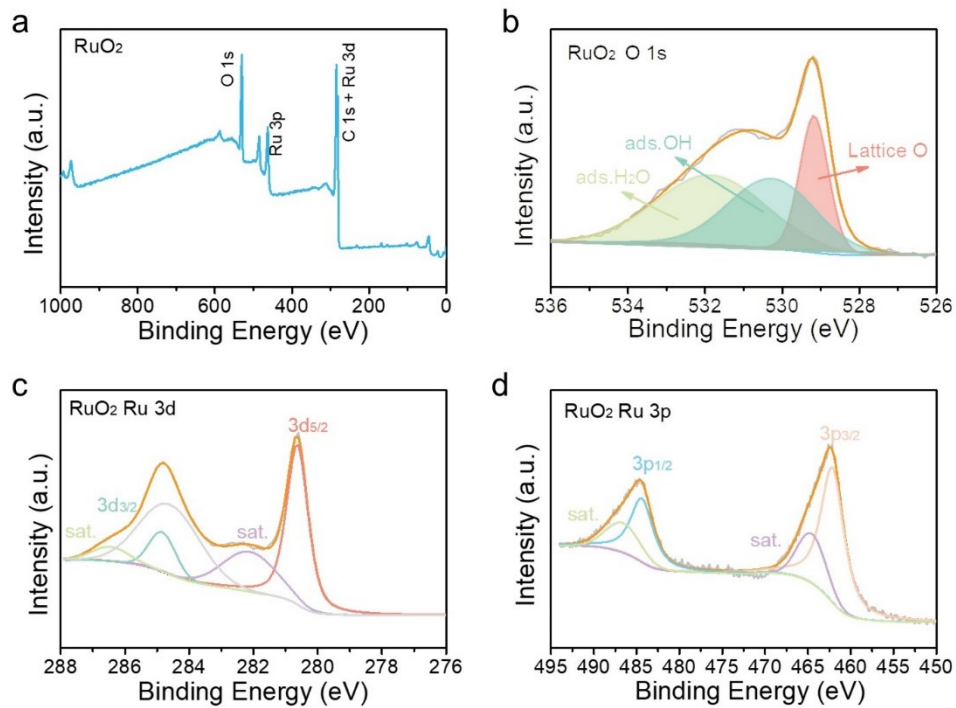

**Fig. S1** XPS spectra of RuO<sub>2</sub>. a) survey. b) O 1s. c) Ru 3d. d) Ru 3p.

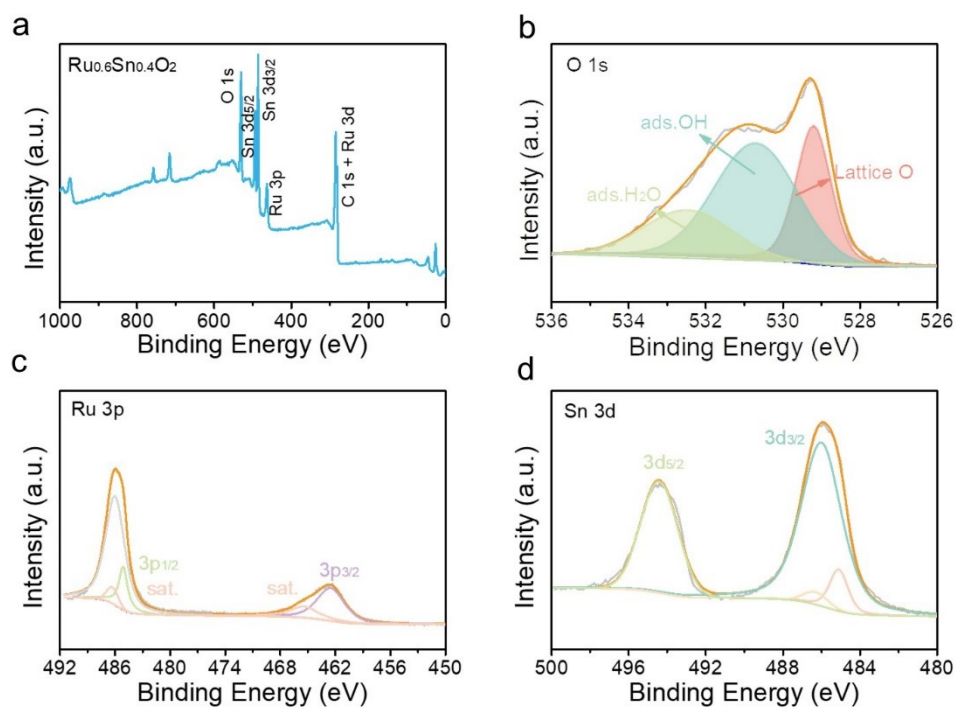

**Fig. S2** XPS spectra of Ru<sub>0.6</sub>Sn<sub>0.4</sub>O<sub>2</sub>. a) survey. b) O 1s. c) Ru 3p. d) Sn 3d.

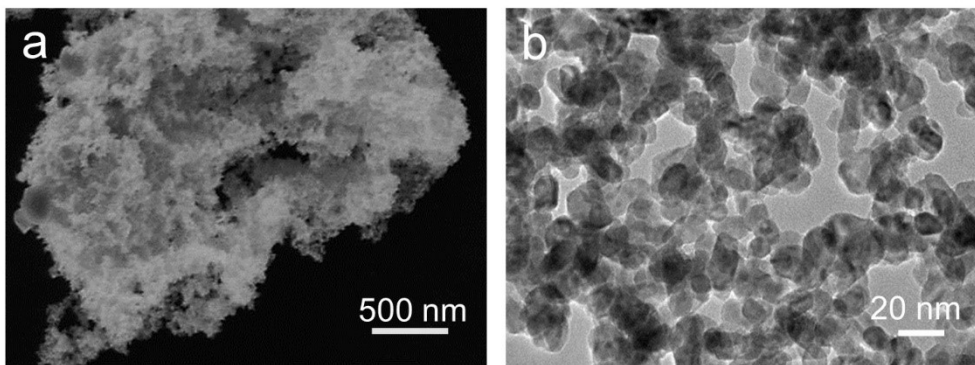

**Fig. S3** a) SEM and b) TEM image of Ru<sub>0.53</sub>Sn<sub>0.47</sub>O<sub>2</sub>.

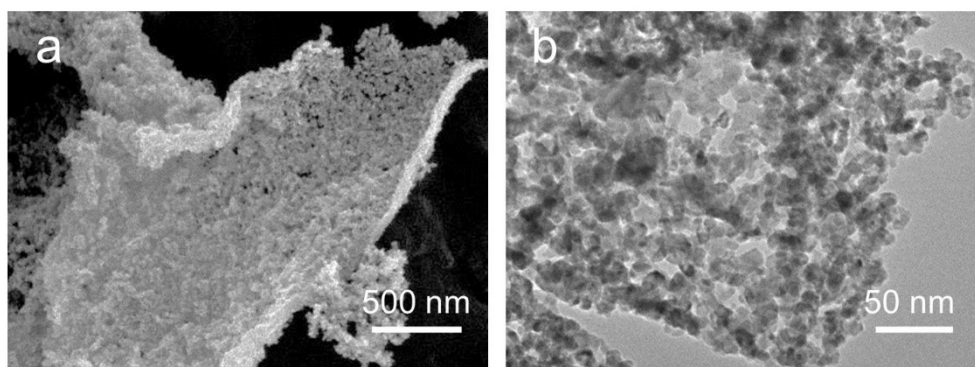

**Fig. S4** a) SEM and b) TEM image of Ru<sub>0.65</sub>Sn<sub>0.35</sub>O<sub>2</sub>.

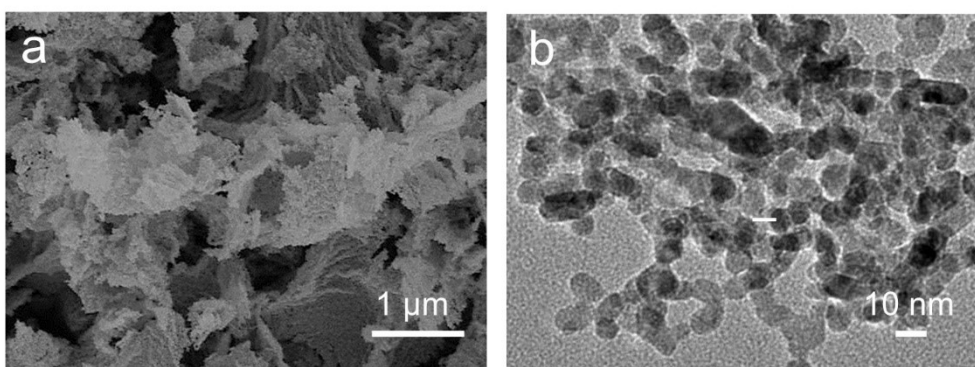

**Fig. S5** a) SEM and b) TEM image of RuO<sub>2</sub>.

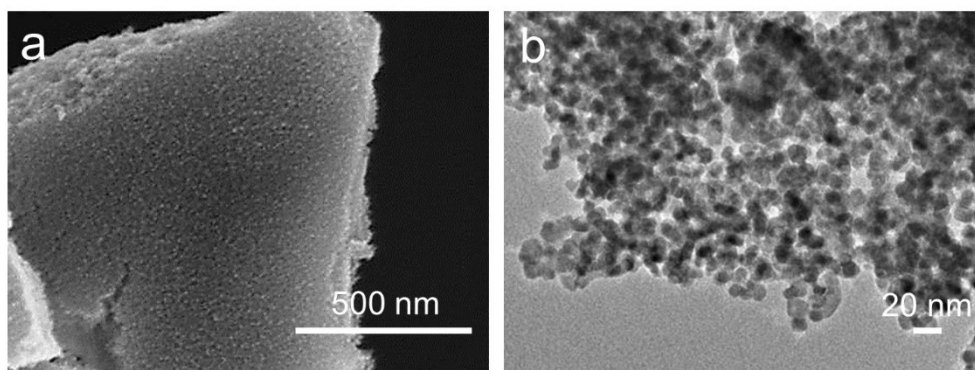

**Fig. S6** a) SEM and b) TEM image of SnO<sub>2</sub>.

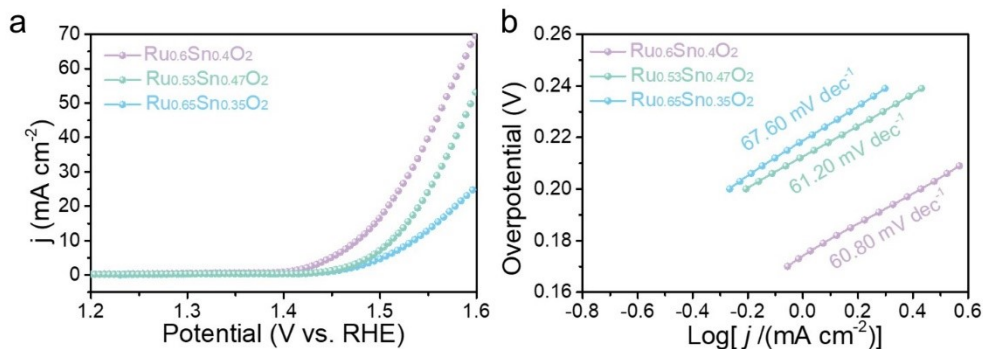

**Fig. S7** a) LSV curves (iR compensated) and b) the related Tafel plots of  $\text{Ru}_{0.6}\text{Sn}_{0.4}\text{O}_2$ ,  $\text{Ru}_{0.53}\text{Sn}_{0.47}\text{O}_2$ ,  $\text{Ru}_{0.65}\text{Sn}_{0.35}\text{O}_2$  electrocatalysts in 1.0 M KOH at a scan rate of  $5 \text{ mV s}^{-1}$ .

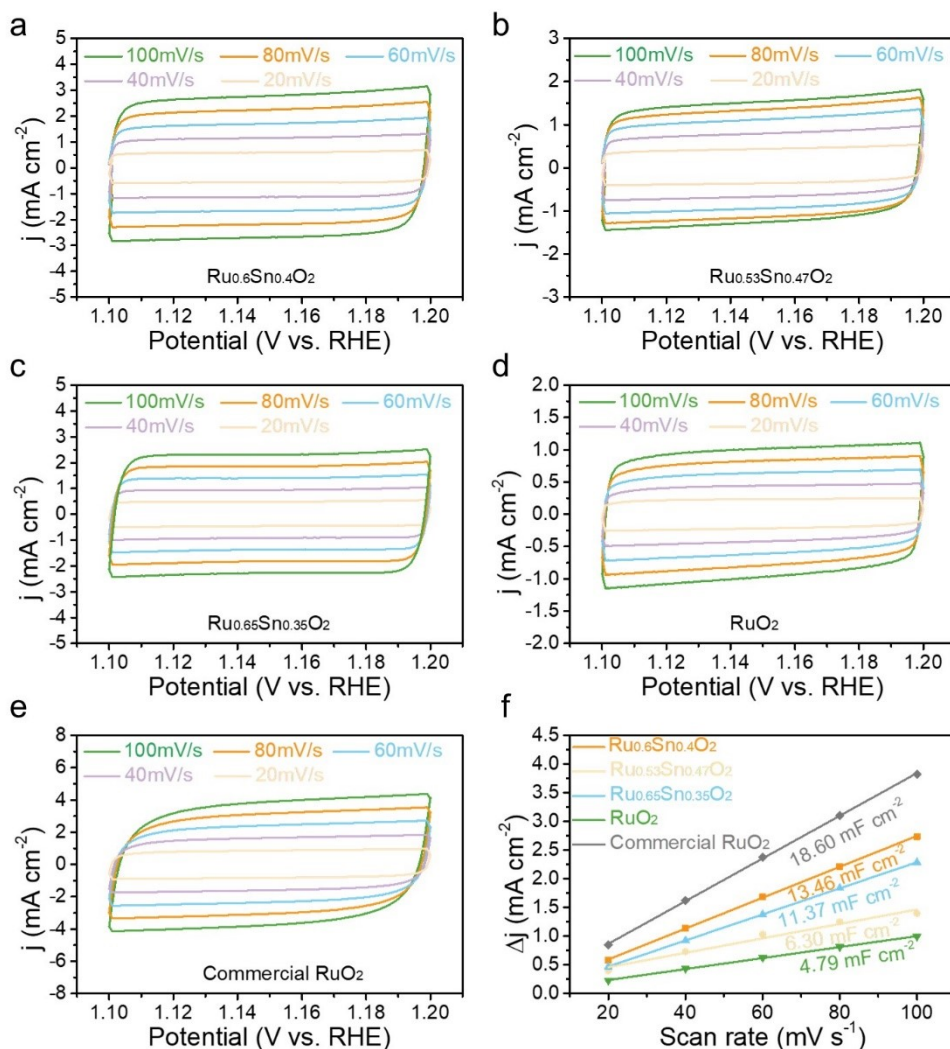

**Fig. S8** Cyclic voltammograms at different scan rates ( $\text{mV s}^{-1}$ ) for a)  $\text{Ru}_{0.6}\text{Sn}_{0.4}\text{O}_2$ , b)  $\text{Ru}_{0.53}\text{Sn}_{0.47}\text{O}_2$ , c)  $\text{Ru}_{0.65}\text{Sn}_{0.35}\text{O}_2$ , d)  $\text{RuO}_2$ , e) Commercial  $\text{RuO}_2$  and f) The current density differences vs. scan rates and corresponding yielded  $C_{dl}$ .

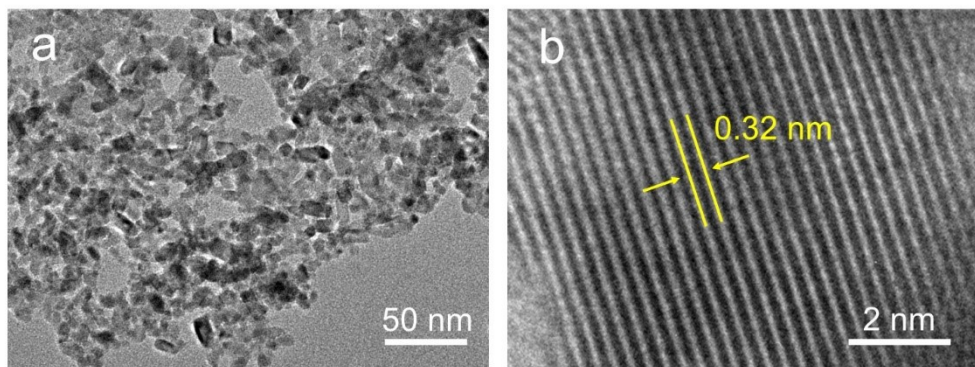

**Fig. S9** a) TEM and b) HRTEM images of Ru<sub>0.6</sub>Sn<sub>0.4</sub>O<sub>2</sub> after durability test.

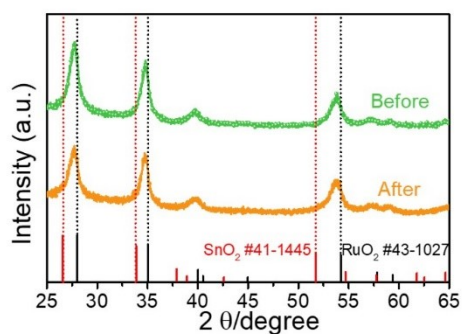

**Fig. S10** XRD pattern of Ru<sub>0.6</sub>Sn<sub>0.4</sub>O<sub>2</sub> powder after durability test.

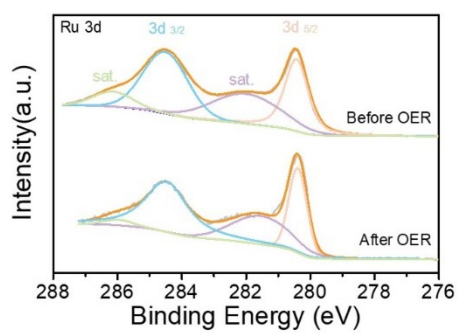

**Fig. S11** XPS spectra of Ru 3d of the Ru<sub>0.6</sub>Sn<sub>0.4</sub>O<sub>2</sub> after durability test.

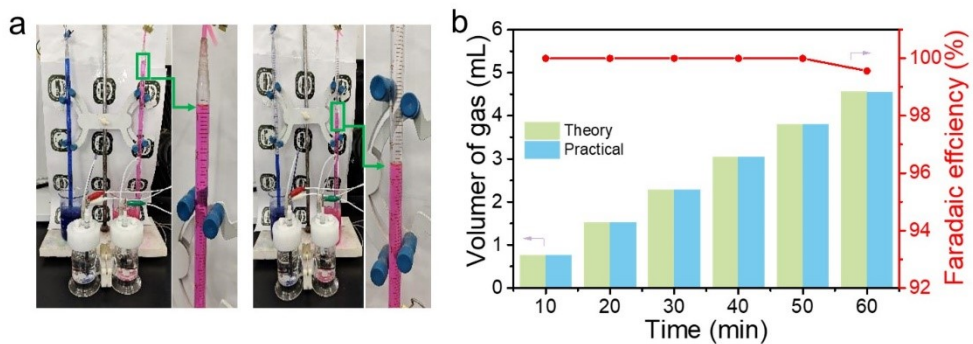

**Fig. S12** a) Device diagram for measuring Faraday efficiency, b) Diagram of the amount of O<sub>2</sub> released over time in 1.0 M KOH.

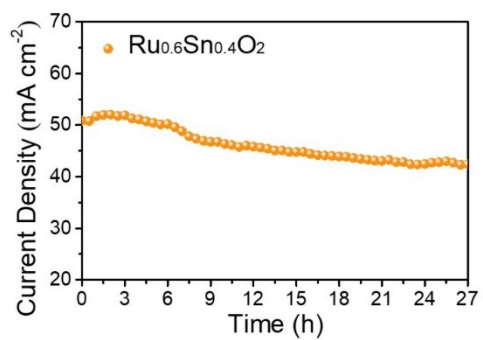

**Fig. S13** Chronoamperometric tests of Ru<sub>0.6</sub>Sn<sub>0.4</sub>O<sub>2</sub>.

**Table S1.** ICP-OES results of different samples.

| Sample                                       | Ru (wt.%) | Sn (wt.%) |
|----------------------------------------------|-----------|-----------|
| $\text{Ru}_{0.53}\text{Sn}_{0.47}\text{O}_2$ | 10.03     | 8.94      |
| $\text{Ru}_{0.6}\text{Sn}_{0.4}\text{O}_2$   | 12.42     | 8.28      |
| $\text{Ru}_{0.65}\text{Sn}_{0.35}\text{O}_2$ | 14.42     | 7.76      |



**Table S2.** The comparison of performance with some representative RuO<sub>2</sub>-based electrocatalysts in alkaline media.

| Catalysts                                                       | Overpotential (mV)<br>@10 mA cm <sup>-2</sup> | Tafel slope<br>(mV dec <sup>-1</sup> ) | Reference |
|-----------------------------------------------------------------|-----------------------------------------------|----------------------------------------|-----------|
| Ru <sub>0.83</sub> Sn <sub>0.17</sub> O <sub>2</sub>            | 245                                           | 61.8                                   | This work |
| RuO <sub>2</sub>                                                | 338                                           | 82.6                                   | 1         |
| a-RuTe <sub>2</sub> PNRs                                        | 285                                           | 62                                     | 2         |
| a/c CoNiRuO <sub>x</sub> -2                                     | 245                                           | 82.3                                   | 3         |
| x-RuO <sub>2</sub> @C                                           | 250                                           | 68                                     | 4         |
| P-RuO <sub>2</sub>                                              | 310                                           | 60.7                                   | 5         |
| RuCoO HSs                                                       | 260                                           | -                                      | 6         |
| β-MnO <sub>2</sub> -Ru                                          | 278                                           | 62                                     | 7         |
| RuO <sub>2</sub> /Co <sub>3</sub> O <sub>4</sub> nanocube       | 302                                           | 74.37                                  | 8         |
| Ru/RuO <sub>2</sub> -MoO <sub>2</sub>                           | 260                                           | 65                                     | 9         |
| RuO <sub>2</sub> @Ti <sub>3</sub> C <sub>2</sub> T <sub>x</sub> | 259                                           | 109                                    | 10        |
| RuO <sub>2</sub> NR                                             | 270                                           | 78.31                                  | 11        |
| CuCo <sub>2</sub> O <sub>4</sub> /CuO@RuO <sub>2</sub> -2       | 279                                           | 115                                    | 12        |
| RuO <sub>2</sub> /CeO <sub>2</sub>                              | 350                                           | 74                                     | 13        |

**Table S3.** Inductively coupled plasma mass spectrometry (ICP-MS) analysis.

| Element                | After 16 h | After 32 h |
|------------------------|------------|------------|
| Ru ( $\mu\text{g/L}$ ) | 4.90       | 22.55      |
| Sn ( $\mu\text{g/L}$ ) | 6.80       | 11.30      |

The dissolved Ru and Sn elements were traced by ICP-MS analysis in the 30 mL electrolyte of 1.0 M KOH after the chronopotentiometry test at  $50 \text{ mA cm}^{-2}$  (16 hours and 32 hours). The concentration of Ru in the electrolyte solution was measured to be  $4.9 \mu\text{g/L}$  after 16 hours and increased to be  $22.55 \mu\text{g/L}$  after 32 hours, which demonstrates the comparatively low dissolution rate of  $\text{Ru}_{0.6}\text{Sn}_{0.4}\text{O}_2$  in 1.0 M KOH.

## References

1. S. L. D. Nicole, Y. Li, W. Xie, G. Wang and J.-M. Lee, *Small*, 2023, **19**, 2206844.
2. J. Wang, L. Han, B. Huang, Q. Shao, H. L. Xin and X. Huang, *Nature Communications*, 2019, **10**, 5692.
3. Y. Zhang, D. Wang, C. Ye, F. Gao, Z. Li and Y. Du, *Chemical Engineering Journal*, 2023, **466**, 143059.
4. H.-S. Park, J. Yang, M. K. Cho, Y. Lee, S. Cho, S.-D. Yim, B.-S. Kim, J. H. Jang and H.-K. Song, *Nano Energy*, 2019, **55**, 49-58.
5. T. Qiu, Z. Liang, W. Guo, S. Gao, C. Qu, H. Tabassum, H. Zhang, B. Zhu, R. Zou and Y. Shao-Horn, *Nano Energy*, 2019, **58**, 1-10.
6. X. Zhuang, Y. Zhou, Z. Jiang, X. Yao and X.-Y. Yu, *Journal of Materials Chemistry A*, 2021, **9**, 26669-26675.
7. Y. Qin, Y. Liu, Y. Zhang, Y. Gu, Y. Lian, Y. Su, J. Hu, X. Zhao, Y. Peng, K. Feng, J. Zhong, M. H. Rummeli and Z. Deng, *ACS Catalysis*, 2023, **13**, 256-266.
8. B.-Y. Guo, X.-Y. Zhang, X. Ma, T.-S. Chen, Y. Chen, M.-L. Wen, J.-F. Qin, J. Nan, Y.-M. Chai and B. Dong, *International Journal of Hydrogen Energy*, 2020, **45**, 9575-9582.
9. Y. Fan, X. Zhang, Y. Zhang, X. Xie, J. Ding, J. Cai, B. Li, H. Lv, L. Liu, M. Zhu, X. Zheng, Q. Cai, Y. Liu and S. Lu, *Journal of Colloid and Interface Science*, 2021, **604**, 508-516.
10. L. Wang, Z. Zhu, W. Ren, X. Zhang, J. Zhang, P. Chen and C. Xu, *ACS Applied Energy Materials*, 2022, **5**, 13990-13996.
11. R. Nazir, U. Basak and S. Pande, *Colloids and Surfaces A: Physicochemical and Engineering Aspects*, 2019, **560**, 141-148.
12. P. Zhang, X. Liu, H. He, Y. Peng and Y. Wu, *Journal of Alloys and Compounds*, 2020, **832**, 154962.
13. S. M. Galani, A. Mondal, D. N. Srivastava and A. B. Panda, *International Journal of Hydrogen Energy*, 2020, **45**, 18635-18644.
